# Supplementary material for: Synthesis of new triazole-based trifluoromethyl scaffolds
Source: Beilstein J Org Chem. 2008 May 29;4:19. doi: 10.3762/bjoc.4.19 (PMC2486457; doi:10.3762/bjoc.4.19)
Supplement: File 1 — General methods, synthetic procedure and spectroscopic data of 2a-i and 4. [file Beilstein_J_Org_Chem-04-19-s001.doc]

**Supporting Information**

**Synthesis of new triazole-based trifluoromethyl scaffolds**

Michela Martinelli, Thierry Milcent, Sandrine Ongeri and Benoit Crousse*

Address :Laboratoire BioCIS-CNRS, Faculté de Pharmacie, Univ. Paris-Sud, rue J. B. Clément, F-92296 Châtenay-Malabry, France. Fax: +33 1 46 83 57 40.

Email:Benoit Crousse* - [benoit.crousse@u-psud.fr](mailto:benoit.crousse@u-psud.fr); Michela Martinelli - [michela.martinelli1@virgilio.it](mailto:michela.martinelli1@virgilio.it); Thierry Milcent - [thierry.milcent@u-psud.fr](mailto:thierry.milcent@u-psud.fr); Sandrine Ongeri - [sandrine.ongeri@u-psud.fr](mailto:sandrine.ongeri@u-psud.fr)

*Corresponding author

Experimental Section

**General Methods**: Column chromatography was carried out on 254F Geduran SiO2 60 (40–63 μm). NMR spectra were recorded with a Bruker AC 200 or 300 spectrometer (1H: 200 or 300 MHz; 19F: 188 MHz; 13C: 75 MHz) in CDCl3 solutions. Chemical shifts are reported in ppm relative to Me4Si and CFCl3 [for 19F NMR (188 MHz, CDCl3, 25 °C)] as internal standards. For the 13C NMR data, reported signal multiplicities were measured relative to C–F coupling. The starting azides are obtained according to known procedures[[1]](#footnote-2).

**General Procedure for the Copper(I)-Catalyzed 1,4-Disubstituted 1,2,3-Triazole** :

To a solution of azide (0.5 mmol) and trifluoromethyl propargylamine (0.5 mmol) in acetonitrile (1.5 ml) was added a catalytic amount of CuI (10 mol%). Then the reaction was stirred at room temperature until completion (GC monitored). The solution was diluted with brine and the aqueous layer was extracted with AcOEt. The combined organic layers were dried (MgSO4) and filtered. After concentration under reduced pressure, the residue was purified by flash chromatography on silica gel.

**N-[1-(1-benzyl-1*H*-1,2,3-triazol-4-yl)-2,2,2-trifluoroethyl]-4-methoxybenzenamine (2a):**

Yellow oil, yield: 82%. 1H NMR (200 MHz, CDCl3) δ: 3.65 (s, 3H), 4.48 (d, 3*J* = 8.7 Hz, 1H), 4.95 (dq, 3*J* = 6.9, 8.6 Hz, 1H), 5.45 (AB system, 3*J* = 7.0, 8.6 Hz, 2H), 6.61 (m, 4H), 7.23 (m, 5H), 7.4 (s, 1H). 13C NMR (75 MHz, CDCl3) δ: 54.4, 55.2 (q, 3*J* = 32 Hz), 55.7, 114.9, 116.2, 122.0, 124.7 (q, 3*J* = 280 Hz CF3), 128.0, 128.9, 129.4, 134.1, 139.4, 141.6, 153.2.

19F NMR (188 MHz, CDCl3) δ: −75.6 (d, *J* = 6.9 Hz):

Elemental analysis for C18H17F3N4O: calculated: C, 59.66; H, 4.73; N, 15.46 found:C, 59.43; H, 4.52; N, 15.23

**2-{4-[1-(4-methoxyphenylamino)-2,2,2-trifluoroethyl]-1*H*-1,2,3-triazol-1-yl}-1-phenyl-ethanone (2b):**

Colorless oil, yield: 76%. 1H NMR (200 MHz, CDCl3) δ: 3.66 (s, 3H), 4.61 (d, 3*J* = 8.6 Hz, 1H), 4.99 (dq, 3*J* = 8.6, 6.8 Hz, 1H), 5.85 (m, 2H), 6.75 (m, 4H), 7.52 (m, 5H), 7.84 (s 1H,). 13C NMR (75 MHz, CDCl3) δ: 55.3 (q, 3*J* = 32 Hz), 55.5, 69.7, 114.9, 116.3, 121.3, 124.0, 124.8 (q, 3*J* = 282 Hz), 139.4, 141.6, 153.5, 177.8.

19F NMR (188 MHz, CDCl3) δ: −74.4 (d, *J* = 6.8 Hz)

Analysis for C19H17F3N4O2 calculated: C 58.46; H 4.39; N 14.35 found: C 58.23; H 4.32; N 14.51

**{4-[1-(4-methoxyphenylamino)-2,2,2-trifluoroethyl]-1*H*-1,2,3-triazol-1-yl}methyl pivalate (2c):**

Yellow oil, Yield: 73%. 1H NMR (200 MHz, CDCl3) δ: 1.16 (s, 9H), 3.67 (s, 3H), 4.48 (d, *3J* = 8.6 Hz, 1H), 5.09 (dq, 3*J* = 8.6, 6.9 Hz, 1H), 6.22 (s, 2H), 6.75 (m, 4H), 7.84 (s 1H,). 13C NMR (75 MHz, CDCl3) δ: 26.7, 38.8, 55.3 (q, 3*J* = 32 Hz), 55.5, 69.7, 114.9, 116.3, 124.0, 124.9 (q, 3*J* = 282 Hz), 139.4, 141, 153, 177.

19F NMR (188 MHz, CDCl3) δ: −75.4 (d, 3*J* = 6.9 Hz)

Analysis for C17H21F3N4O3: calculated: C 52.85; H 5.48; N 14.50, found: C 52.80, H 5.62, N 14.52

**methyl 2-{4-[1-(4-methoxyphenylamino)-2,2,2-trifluoroethyl]-1*H*-1,2,3-triazol-1-yl}acetate (2d):**

Brown oil, yield: 83%. 1H NMR (200 MHz, CDCl3) δ: 3.66 (s, 3H), 3.77 (s, 3H), 4.49 (d, 3*J* = 8.6 Hz, 1H), 5.09 (dq, 3*J* = 8.6, 6.9 Hz, 1H), 5.15 (m, 2H), 6.75 (m, 4H), 7.74 (s 1H,). 13C NMR (75 MHz, CDCl3) δ: 51.2, 55.3 (q, 3*J* = 32 Hz), 55.5, 57.3, 114.6, 116.7, 123.0, 125.2 (q, 3*J* = 282 Hz), 139.3, 141.4, 153.6, 166.3.

19F NMR (188 MHz, CDCl3) δ: −75.4 (d, 3*J* = 6.9 Hz)

Analysis for C14H15F3N4O3 calculated: C 48.84; H 4.39; N, 16.27 found: C 48.92, H 4.53, N 16.23

**2-{4-[1-(4-methoxyphenylamino)-2,2,2-trifluoroethyl]-1*H*-1,2,3-triazol-1-yl}ethanol (2e):**

Yellow oil, yield: 87%. 1H NMR (300 MHz, CDCl3) δ: 3.65 (s, 3H), 4.10 (t, 3*J* = 6.4 Hz, 2H), 4.44 (t, 3*J* = 6.4 Hz, 2H), 4.48 (d, 3*J* = 8.5 Hz, 1H), 5.09 (dq, 3*J* = 8.5, 6.4 Hz, 1H), 6.65 (m, 4H), 7.84 (s 1H,). 13C NMR (75 MHz, CDCl3) δ: 52.7, 55.1 (q, 3*J* = 31.6 Hz), 55.7, 60.4, 114.9, 116.0, 124.0, 124.7 (q, 3*J* = 282 Hz), 139.4, 141, 153.6.

19F NMR (200 MHz, CDCl3) δ: −75.29 (d, 3*J* = 6.4 Hz)

Analysis for C13H15F3N4O2 calculated: C 49.37; H 4.78; N 17.71 found: C 49.12; H 4.56; N 17.86

**N-benzyl-1-(1-benzyl-1*H*-1,2,3-triazol-4-yl)-2,2,2-trifluoroethanamine (2f):**

Colorless oil, yield: 75%. 1H NMR (200 MHz, CDCl3) δ: 3.84 (d, 3*J* = 13.2 Hz, 1H), 3.91 (d, 3*J* = 12 Hz, 1H), 4.35 (q, 3*J* = 7.1 Hz, 1H), 5.42 (s, 2H), 7.25 (m, 10H), 7.41 (s, 1H). 13C NMR (75 MHz, CDCl3) δ: 51.6, 54.4, 56.3 (q, 3*J* = 30 Hz), 122.5, 124.7 (q, 3*J* = 290 Hz), 127.4, 128.1, 128.2, 128.5, 128.9, 129.5, 130.9, 138.9, 142.3.

19F NMR (188 MHz, CDCl3) δ: −74.9 (d, 3*J* = 7.1 Hz)

Analysis for C18H17F3N4 calculated: C 62.42; H 4.95; N 16.18 found: C 62.23, H 4.56, N 16.45

**2-{4-[1-(benzylamino)-2,2,2-trifluoroethyl]-1*H*-1,2,3-triazol-1-yl}-1-phenylethanone (2g):**

Oil, yield: 63%. 1H NMR (200 MHz, CDCl3) δ: 3.52 (d, 3*J* = 13.2 Hz, 1H), 3.81 (d, 3*J* = 13.2 Hz, 1H), 4.21 (q, 3*J* = 7.1 Hz, 1H), 5.75 (d, 3*J* = 18.5 Hz, 1H), 5.82 (d, 3*J* = 18.5 Hz, 1H), 7.25 (m, 5H), 7.41 (m, 5H), 7.52 (s, 1H). 13C NMR (75 MHz, CDCl3) δ: 51.2, 56.1, 56.4 (q, 3*J* = 31 Hz), 123.8, 124.8 (q, *3J* = 279 Hz), 127.3, 127.4, 127.5, 128.5, 128.7, 128.6, 137.2, 138.9, 141.6, 166.3.

19F NMR (188 MHz, CDCl3) δ: −74.9 (d, 3*J* = 7.1 Hz)

Analysis for C19H17F3N4O calculated: C 60.96; H 4.58; N 14.97 found: C 60.82; H 5.56; N 14.93

**methyl 2-{4-[1-(benzylamino)-2,2,2-trifluoroethyl]-1*H*-1,2,3-triazol-1-yl}acetate (2h):**

Yellow oil, yield 92% 1H NMR (200 MHz, CDCl3) δ: 3.21 (s, 3H), 3.83 (d, 3*J* = 13.2 Hz, 1H), 4.21 (q, 3*J* = 7.1 Hz, 1H), 4.23 (q, 3*J* = 7.1 Hz, 1H), 5.73 (d, 3*J* = 18.5 Hz, 1H), 5.82 (d, 3*J* = 18.5 Hz, 1H), 7.22 (m, 5H), 7.35 (s, 1H). 13C NMR (75 MHz, CDCl3) δ: 50.2, 50.8, 51.6, 56.3 (q, 3*J* = 30 Hz), 121.8, 124.8 (q, 3*J* = 279 Hz), 127.5, 128.5, 128.7, 138.9, 141.6, 168.3.

19F NMR (188 MHz, CDCl3) δ: −75.3 (d, 3*J* = 7.1 Hz)

Analysis for C14H15F3N4O2: calculated: C 51.22; H 4.61; N 17.07 found: C 51.32, H 4.52, N 17.12

g

**2-{4-[1-(benzylamino)-2,2,2-trifluoroethyl]-1*H*-1,2,3-triazol-1-yl}ethanol (2i):**

White powder, yield: 73%. 1H NMR (200 MHz, CDCl3) δ: 2.56 (s br., 2H), 3.8(d, 3*J* = 12.5 Hz, 1H) 3.81 (d, 3*J* = 12.5 Hz, 1H), 3.97 (t, 3*J* = 5 Hz, 2H), 4.22 (q, 3*J* = 7.3 Hz, 1H), 4.4 (t, 3*J* = 5 Hz, 2H), 7.25 (m, 5H), 7.62 (s, 1H). 13C NMR (75 MHz, CDCl3) δ: 51.5, 52.8, 56.2 (q, *J* = 30 Hz), 60.9, 123.9, 124.5 (q, J = 279 Hz), 127.5, 128.3, 128.6, 138.8, 141.8.

19F NMR (188 MHz, CDCl3) δ: −74.8 (d, *3J* = 7.3 Hz)

Analysis for C13H15F3N4O calculated: C 52.00; H 5.04; N 18.66 found: C 51.82; H 5.12; N 18.85

**methyl 2-(4-{(*R*)-1-[(*R*)-2-methoxy-1-phenylethylamino]-2,2,2-trifluoroethyl}-1*H*-1,2,3-triazol-1-yl)acetate (4):**

Yellow oil, yield: 79%. 1H NMR (200 MHz, CDCl3) δ: 3.22 (s, 3H), 3.28 (dd, 3*J* = 3.9, 9.6 Hz, 1H), 3.36 (t, 3*J* = 9.6 Hz, 1H), 3.71 (s, 3H), 3.85 (dd, 3*J* = 3.9, 9.6 Hz, 1H),4.12 (q, 3*J* = 7.5Hz, 1H), 5.11 (s, 2H), 7.25 (m, 5H), 7.63 (s, 1H). 13C NMR (75 MHz, CDCl3) δ: 50.8, 53.1, 53.9 (q, 3*J* = 30.7 Hz), 58.5, 59.1, 77.3, 124.2, 124.5 (q, 3*J* = 279 Hz), 127.9, 128.1, 128.7, 138.7, 142.5, 166.

19F NMR (188 MHz, CDCl3) δ: −75.0 (d, 3*J* = 7.5 Hz)

Analysis for C16H19F3N4O3 calculated: C 51.61; H 5.14; N 15.05 found: C 51.65; H 5.24; N 15.12

1. Loren J. C.; Krasinski, A.; Tokin, V. V.; Sharpless, K. B. *Synlett* 2**005,** *18,* 2847–2850. doi: 10.1055/s-2005-918944; Lu, X.; Bittman, R. J. *Org. Chem.* **2005,** *18,* 4746–4750. doi:10.1021/jo050513u [↑](#footnote-ref-2)
